# Supplementary material
Source: publisher site journal article supplement (https://www.dovepress.com/article/supplementary_file/559296/559296_Supplemantary%20information_2_1.docx)
Supplement: Supplementary file 1 [file 559296_Supplemantary%20information_2_1.docx]

**Manuscript ID number:** 559296

**Title of paper:** Risk factors associated with virological failure in HIV patients with low level viremia: a retrospective study

Tables

sTable 1. Categorical variable transformation based on ROC analysis

| Variables, n(%) | Total (n = 773) |
| --- | --- |
| ART delay |  |
| ≥1.6 months | 331 (42.82) |
| <1.6 months | 442 (57.18) |
| triglyceride |  |
| ≥1.96 mmol/L | 268 (34.67) |
| <1.96 mmol/L | 505 (65.33) |

**Notes**: **ART**, Antiretroviral Therapy

Figures


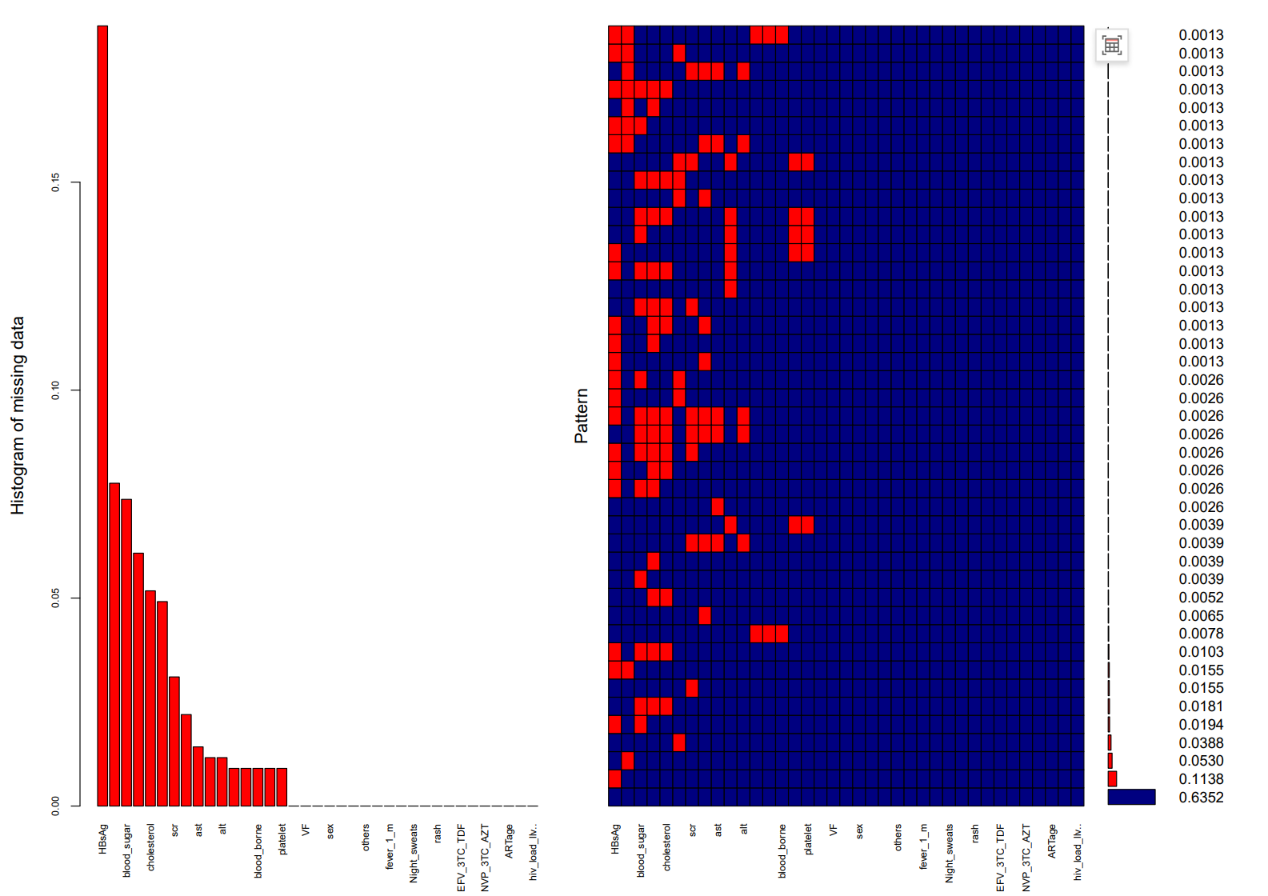


sFig. 1 Missing Value Imputation.


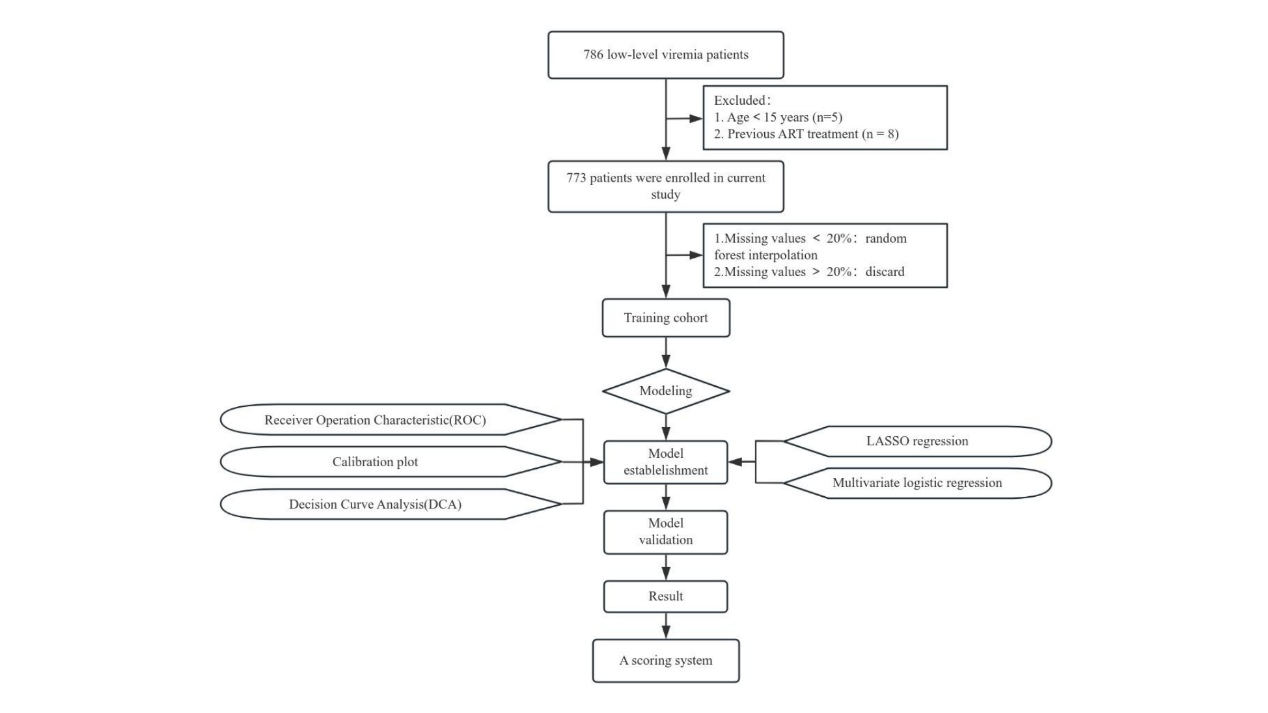


sFig. 2 Patient selection and model development pipeline for predicting virological failure in low-level viremia patients.
